RESEARCH ARTICLE

# Higher Thermal Acclimation Potential of Respiration but Not Photosynthesis in Two Alpine *Picea* Taxa in Contrast to Two Lowland Congeners

Xiao Wei Zhang<sup>1</sup>, Jing Ru Wang<sup>1</sup>, Ming Fei Ji<sup>1</sup>, Richard Ian Milne<sup>2</sup>, Ming Hao Wang<sup>1</sup>, Jian-Quan Liu<sup>1</sup>, Sheng Shi<sup>1</sup>, Shu-Li Yang<sup>1</sup>, Chang-Ming Zhao<sup>1\*</sup>

**1** State Key Laboratory of Grassland Agro-Ecosystems, School of Life Sciences, Lanzhou University, Lanzhou, 730000, China, **2** Institute of Molecular Plant Sciences, The University of Edinburgh, Daniel Rutherford Building, King's Buildings, Mayfield Road, Edinburgh, EH93JH, United Kingdom

\* [zhaochm@lzu.edu.cn](mailto:zhaochm@lzu.edu.cn)

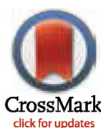

## Abstract

The members of the genus *Picea* form a dominant component in many alpine and boreal forests which are the major sink for atmospheric CO<sub>2</sub>. However, little is known about the growth response and acclimation of CO<sub>2</sub> exchange characteristics to high temperature stress in *Picea* taxa from different altitudes. Gas exchange parameters and growth characteristics were recorded from four year old seedlings of two alpine (*Picea likiangensis* vars. *rubescens* and *linzhiensis*) and two lowland (*P. koraiensis* and *P. meyeri*) taxa. Seedlings were grown at moderate (25°C/15°C) and high (35°C/25°C) day/night temperatures, for four months. The approximated biomass increment ( $\Delta D^2H$ ) for all taxa decreased under high temperature stress, associated with decreased photosynthesis and increased respiration. However, the two alpine taxa exhibited lower photosynthetic acclimation and higher respiratory acclimation than either lowland taxon. Moreover, higher leaf dry mass per unit area (LMA) and leaf nitrogen content per unit area ( $N_{area}$ ), and a smaller change in the nitrogen use efficiency of photosynthesis (PNUE) for lowland taxa indicated that these maintained higher homeostasis of photosynthesis than alpine taxa. The higher respiration rates produced more energy for repair and maintenance biomass, especially for higher photosynthetic activity for lowland taxa, which causes lower respiratory acclimation. Thus, the changes of  $\Delta D^2H$  for alpine spruces were larger than that for lowland spruces. These results indicate that long term heat stress negatively impact on the growth of *Picea* seedlings, and alpine taxa are more affected than low altitude ones by high temperature stress. Hence the altitude ranges of *Picea* taxa should be taken into account when predicting changes to carbon fluxes in warmer conditions.

## OPEN ACCESS

**Citation:** Zhang XW, Wang JR, Ji MF, Milne RI, Wang MH, Liu J-Q, et al. (2015) Higher Thermal Acclimation Potential of Respiration but Not Photosynthesis in Two Alpine *Picea* Taxa in Contrast to Two Lowland Congeners. PLoS ONE 10(4): e0123248. doi:10.1371/journal.pone.0123248

**Academic Editor:** Paul C. Struik, Wageningen University, NETHERLANDS

**Received:** November 27, 2014

**Accepted:** March 2, 2015

**Published:** April 13, 2015

**Copyright:** © 2015 Zhang et al. This is an open access article distributed under the terms of the [Creative Commons Attribution License](https://creativecommons.org/licenses/by/4.0/), which permits unrestricted use, distribution, and reproduction in any medium, provided the original author and source are credited.

**Data Availability Statement:** All relevant data are within the paper and its Supporting Information files.

**Funding:** This research was funded by the National Science Foundation of China (30930072, 31170571 and 31370603).

**Competing Interests:** The authors have declared that no competing interests exist.

## Introduction

Temperature affects almost all aspects of terrestrial carbon processes, including photosynthesis and respiration [1–4], therefore these processes will likely be profoundly affected by climate change, altering the carbon balance between the atmosphere and the biosphere [2, 5, 6]. Alpine plants play an important role in the high altitude ecosystems of Northern Hemisphere, where store the greatest fraction of carbon stocks; nevertheless, the impact of global warming has been shown not only to rise by almost 4–10°C in high altitude areas of Northern Hemisphere, but also to increase in the frequency, duration and severity of periods with exceptionally high temperatures [7]. If elevated temperatures exceed a species' thermal optimum for metabolism, the growth would be inhibited due to lower photosynthetic rates and higher respiratory rates [6, 8]. So investigating how photosynthesis and respiration in alpine plants from these regions will respond to high temperature stress is crucial.

However, some alpine species appear unable to respond negatively to high temperatures due to thermal acclimation, which maintains a certain rate of photosynthesis and respiration at the variable growth conditions [6, 9–12]. Thermal acclimation has been shown to optimise carbon gain in three ways: shifting the thermal optimum for net photosynthesis ( $T_{opt}$ ) to improve photosynthetic capacity [4, 10, 13, 14]; altering the quotient of respiration rates given a 10°C change in temperature ( $Q_{10}$ ) (termed type I acclimation); and/or shifting the base respiration rates at a reference temperature (the elevation) of the temperature-response curves for respiration (type II acclimation) [5, 11, 15–18]. Hence temperature acclimation may be a critical factor in predicting how high altitude plant fitness will be affected by high temperatures [10, 17].

Variations in thermal acclimation of photosynthesis and respiration among plants may contribute to change in leaf structure and biochemistry [6, 14, 19, 20]. Leaves with high dry mass per unit area (LMA) tend to have lower photosynthetic rates and higher respiratory rates [21]. As an important component of photosynthetic and respiratory apparatus, high leaf nitrogen content per unit area ( $N_{area}$ ), and nitrogen use per leaf, indicates large investment in photosynthetic and respiratory processes [19, 22]. Therefore, when plants grown in high temperature conditions, the compensatory mechanism of changes in LMA,  $N_{area}$  and leaf nitrogen use efficiency may be associated with photosynthetic and respiratory acclimation [5, 23–27].

Members of the genus *Picea* (spruces) are sciophilous trees that form a dominant component in many alpine and boreal evergreen forests [28, 29]. The species are genetically similar to one another, and introgression occurs [30–32]. Increased temperatures have been shown to reduce net carbon uptake in two *Picea* species [8, 25, 26] and if this applies across the genus, then climate change could have a profound effect upon the carbon balance of boreal forests. Therefore, the current study examined temperature acclimation and carbon balance in seedlings of four *Picea* taxa, which originated from two distinguished altitudinal regions. We selected two lower altitude species from the southern limit of boreal coniferous forests (*P. koraiensis* and *P. meyeri*), and two alpine congeneric species, *P. likiangensis* vars. *rubescens* and *linzhiensis*, distribution on the Qinghai-Tibet Plateau, which constitutes the highest alpine treelines in the northern hemisphere [33]. In these regions, plants are more sensitive to temperature than other regions [34, 35]. Therefore, the objectives of our study were to examine the effect of high growth temperature on the growth, photosynthesis and respiration rates of *Picea* taxa. We also determined whether the degree of acclimation of photosynthesis and respiration would differ between two *Picea* groups. Our hypothesis was that *Picea* species were more prone to high temperature stress; and lowland taxa showed higher thermal acclimation than alpine taxa, because of lower elevated temperature compared with higher mean growth season temperature ( $T_{growth}$ ) of lowland taxa in higher growing temperature.

## Materials and Methods

### Ethics Statement

No specific permits were required for the described field studies. Because four *Picea* taxa were not endangered or protected species, and collecting seeds of each *Picea* taxa from its distribution range did not involve any National Nature Reserve in China. Additionally, this study was conducted at Plant Germplasm Repository, Lanzhou University, an experimental base for our group (Division of molecular Ecology in State Key Laboratory of Grassland Agro-Ecosystems).

### Plant materials and growth conditions

*Picea likiangensis* var. *rubescens* and *P. likiangensis* var. *linzhiensis* are distributed between 2900 m and 4200 m a.s.l on the Qinghai-Tibet Plateau, whereas *P. koraiensis* and *P. meyeri* occur from 400 m (Northeast China) to 2700 m (North China) a.s.l. All seeds of each taxon were collected from the centre of its distribution range, and then were germinated in a common garden plantation in the Plant Germplasm Repository, Lanzhou University, China (35°56'37" N, 104°09'05" E, Alt: 1750 m). All seedlings grown in this plantation through three years to acclimate to the fluctuation of temperature in the growing season (May–August) from 25.8°C (day) to 7.7°C (night). In mid-January 2009, prior to the beginning of the fourth growing season, all seedlings were planted in pots (upper inner diameter: 24 cm, basal diameter: 16 cm, height: 17 cm). Each pot was filled with a homogeneous mixture comprising equal volumes of peat soil and perlite. On 15 June 2009 when new twigs of each spruce were only start growing, eighteen pots of each taxon, accordance of the same height were selected and divided into two growth temperature conditions. Nine pots of each spruce were grown at  $25 \pm$  (S.D.)  $0.56^\circ\text{C}$  (day) and  $15 \pm$  (S.D.)  $0.45^\circ\text{C}$  (night) in a growth chamber [moderate temperature (MT)], whereas other half of the pots were moved to an adjacent  $35 \pm$  (S.D.)  $0.65^\circ\text{C}$  (day) and  $25 \pm$  (S.D.)  $0.51^\circ\text{C}$  (night) chamber [high temperature (HT)]. In all chambers, light intensity during the day time was  $\sim 300 \mu\text{mol photons m}^{-2} \text{s}^{-1}$ , and relative humidity was  $50 \pm 5\%$ . The growing period was 15 June to 15 October 2009; day and night lengths were 12 h each, and each pot received ample watering to avoid any effect on the results from water deficit.

Non-destructive growth measurements were carried out at the beginning (15 June 2009;  $t_1$ ) and the end (15 October;  $t_2$ ) of temperature treatments. Stem height (H) and basal stem diameter (D) were measured on all samples of each temperature treatment. Stem diameter measurements were made using a digital calliper at 0 cm above the soil. A steel tape was used for stem height measurements. Using basal diameter (D) and height (H) measurements, the stem volume index was calculated as  $D^2H$ , which is usually strongly correlated with above-ground biomass [36]. Therefore, the approximated biomass increment during the experimental period was estimated by  $\Delta D^2H$ , which was calculated by  $D_{t_2}^2 H_{t_2} - D_{t_1}^2 H_{t_1}$ .

### Gas exchange and LMA measurements

Leaf-level gas exchange measurements were made on fully expanded current-year needles with a portable open-path gas exchange system with  $\text{CO}_2$  control (Li-6400, LI-COR Biosciences, Inc.) using a Li-6400-07 Needle Chamber, with an external light source (light levels:  $\sim 800 \mu\text{mol m}^{-2} \text{s}^{-1}$ ). At least five random seedlings for each treatment per species were measured on the end period. During the measurements, the  $\text{CO}_2$  concentration was maintained at the atmosphere levels ( $\sim 380 \mu\text{mol} \cdot \text{mol}^{-1}$ ). Firstly, net photosynthetic rates ( $P_{\text{growth}}$ ) and dark respiratory rates ( $R_{\text{growth}}$ ) were measured at the growth temperature in HT and MT leaves on 15 October. Secondly, six-point temperature response functions of photosynthetic and respiratory rates ( $15\text{--}40^\circ\text{C}$  in  $5^\circ\text{C}$  intervals high to low) were determined on next four days (one species

per day). The respiratory rates were measured after a short dark period (between 5 and 10 min) to ensure that photosynthetic activity had ceased. Measurement temperatures were obtained by changing the air temperature of growth chamber, and micro-changing by Li-6400 temperature control system. Between each step change in temperature, we at least waited 30 min for them to stabilize before measuring the samples in random order. After the measurements of gas exchange, needles were harvested and leaf area (LA) per sample was determined using a LI-3100A portable area meter (LI-COR Biosciences, Inc.). Each sample was then oven-dried for 72 h at 65°C, its dry mass determined and LMA calculated. All gas exchange parameters were reported on a needle dry mass basis, which were converted by their corresponding LMA.

### Leaf N nitrogen concentrations

We measured the concentration of nitrogen (N) using leaf samples from the gas exchange measurements. These dry samples were finely ground with mortar and pestle, and then leaf nitrogen content per unit mass was determined using a CHN analyzer (Vario EL, Elementar, Germany) at the Analytical Testing Centre, Lanzhou University, China. Leaf N content per unit area ( $N_{\text{area}}$ ) was calculated by multiplying leaf nitrogen content per unit dry mass by the LMA. The nitrogen use efficiency of photosynthesis (PNUE) at each growing temperature was calculated by dividing photosynthetic rates ( $P_{\text{growth}}$ ) per unit area by  $N_{\text{area}}$ .

### Data analysis

The photosynthesis data from temperature response curves were used to determine the temperature dependence. To estimate optimum temperature for photosynthesis ( $T_{\text{opt}}$ ) and the photosynthetic rate at the optimum temperature ( $P_{\text{opt}}$ ), photosynthesis-temperature response curves were fitted with a quadratic equation [4, 37]:

$$P_T = aT^2 + bT + c \quad (1)$$

Where  $P_T$  represents the mean net photosynthetic rate at temperature  $T$  in °C;  $a$ ,  $b$  and  $c$  are fitting parameters for the quadratic curve.  $T_{\text{opt}}$  was the  $x$ -value corresponding to the peak of the quadratic curve which was calculated using the equation  $-\frac{b}{2a}$ . Likewise,  $P_{\text{opt}}$  was the peak  $y$ -value of the equation  $\frac{4ac-b^2}{4a}$ .

Respiratory temperature response curves were analysed as previously described [12], where respiration rate ( $R$ ) at a given temperature is given by:

$$R = R_{15} Q_{10}^{\frac{T-15}{10}} \quad (2)$$

Where  $R_{15}$  is the estimated specific base respiration rate at the reference temperature of 15°C,  $T$  is foliage temperature and  $Q_{10}$  is a parameter, describing the proportional change in respiration with a 10°C increase in temperature.

Quantifying the degree of temperature acclimation of each parameter for each *Picea* taxon and geographical groups was calculated as the ratio of  $P_{\text{growth}}$  and  $R_{\text{growth}}$  measured at 35°C in HT leaves to that measured at 25°C in MT leaves (HT/MT). As an index for the degree of the acclimation, a ratio that is close to 1.0 indicates that the temperature acclimation is high [6, 19].

### Statistical analysis

The parameters from temperature response curves for net photosynthesis were estimated by fitting a second-order polynomial (Eq 1) to each curve. And individual respiratory temperature response curves were fitted using nonlinear regression (Eq 2). If the coefficient of determination

( $R^2$ ) for one curve was less than 0.8, this curve was removed. Hence, there were 3–5 replicates in every growth condition for each species to use for nonlinear regression and statistical analysis in *Picea* taxon level. The significance of all differences in traits between *Picea* taxa for each treatment, or between treatments for each taxon at the 5% level were determined by one-way analyses of variance (ANOVA) and Tukey test for multiple comparisons. Meanwhile, we integrated all individuals ( $n = 6–10$ ) from the same group to evaluate differences between alpine and lowland groups. Differences in traits between groups for each treatment, or between treatments for each group at the 5% level were tested with one-way ANOVA. All regressions and statistical analysis were performed with SPSS 16.0 (SPSS Inc., Chicago, IL, USA).

## Results

### Temperature effects on the gas exchange characteristics and plant growth

$P_{\text{growth}}$  measured at 25°C (MT) was higher in the alpine *Picea* taxa than in the lowland taxa (Table 1), and significantly different across *Picea* taxa, such that  $P_{\text{growth}}$  for *P. likiangensis* var. *linzhiensis* >  $P_{\text{growth}}$  for *P. likiangensis* var. *rubescens* >  $P_{\text{growth}}$  for *P. meyeri* >  $P_{\text{growth}}$  for *P. koraiensis* MT leaves (S1 Table). Comparing temperature treatments,  $P_{\text{growth}}$  was significantly lower at 35°C (HT) leaves than at 25°C (MT) leaves for two altitude groups and all taxa except *P. meyeri* (Table 1 and S1 Table). After 35°C stress,  $P_{\text{growth}}$  for the lowland *Picea* taxa showed significantly higher than that for the alpine taxa (Table 1). Comparing  $P_{\text{growth}}$  at HT leaves among taxa, the value for *P. meyeri* was significantly higher than that for either variety of *P. likiangensis*; *P. koraiensis* was intermediate (S1 Table). Based on this, the index of  $P_{\text{growth}}$  (HT/MT) was higher at the lowland taxa (Table 1 and Fig 1), suggesting the lowland *Picea* taxa exhibited greater homeostasis than the alpine taxa in response to high temperature stress.

$R_{\text{growth}}$  measured at MT leaves was significantly higher in the alpine taxa than the lowland taxa, highest in *P. likiangensis* var. *linzhiensis* in particular (Table 1 and S1 Table). For all taxa except *P. likiangensis* var. *linzhiensis*,  $R_{\text{growth}}$  significantly increased with increasing growth temperature in both altitude groups (Table 1 and S1 Table). However, both altitude groups exhibited similar  $R_{\text{growth}}$  in HT leaves. Among taxa, *P. koraiensis* had higher  $R_{\text{growth}}$  at 35°C than any other (S1 Table);  $\Delta R_{\text{growth}}$  ( $R_{\text{growthHT}} - R_{\text{growthMT}}$ ) also varied, being highest in *P. koraiensis* and lowest in *P. likiangensis* var. *linzhiensis* (S1 Table). So the index of  $R_{\text{growth}}$  (HT/MT) for the lowland taxa ( $1.66 \pm 0.11$ ) was significantly higher than that for the alpine taxa ( $1.20 \pm 0.06$ ; Table 1 and Fig 1). Hence, there was higher homeostasis of respiration for the alpine taxa in response to high temperature stress. Meanwhile, the  $R_{\text{growth}}$  (HT/MT) was

**Table 1. Temperature acclimation of photosynthesis and respiration, and the approximated biomass increment ( $\Delta D^2H$ ) in the lowland and alpine *Picea* taxa.**

|                    | $P_{\text{growth}}$ (nmol CO <sub>2</sub> g <sup>-1</sup> s <sup>-1</sup> ) |                    | Ratio<br>(acclimation) | $R_{\text{growth}}$ (nmol CO <sub>2</sub> g <sup>-1</sup> s <sup>-1</sup> ) |                   | Ratio<br>(acclimation) | $\Delta D^2H$ (cm <sup>3</sup> ) |                   |
|--------------------|-----------------------------------------------------------------------------|--------------------|------------------------|-----------------------------------------------------------------------------|-------------------|------------------------|----------------------------------|-------------------|
|                    | MT                                                                          | HT                 |                        | MT                                                                          | HT                |                        | MT                               | HT                |
| Low altitude taxa  | 12.73 ± 0.70<br>aA                                                          | 10.33 ± 0.62<br>aB | 0.82±0.04 a            | 5.39 ± 0.33<br>aA                                                           | 8.87 ± 0.69<br>aB | 1.66 ± 0.11 a          | 5.77 ± 0.08<br>aA                | 3.52 ± 0.08<br>aB |
| High altitude taxa | 18.98 ± 0.31<br>bA                                                          | 7.52 ± 0.48 bB     | 0.40±0.03 b            | 6.61 ± 0.27<br>bA                                                           | 7.75 ± 0.28<br>aB | 1.20 ± 0.06 b          | 6.83 ± 0.14<br>bA                | 3.44 ± 0.11<br>aB |

Notes: Each value represents mean ± SE. Letters after SE values distinguish between statistically separable ( $P < 0.05$ ) values for different temperature treatment (A, B) and different geographical locations in same temperature treatment (a, b).  $n = 6 - 10$ .

doi:10.1371/journal.pone.0123248.t001

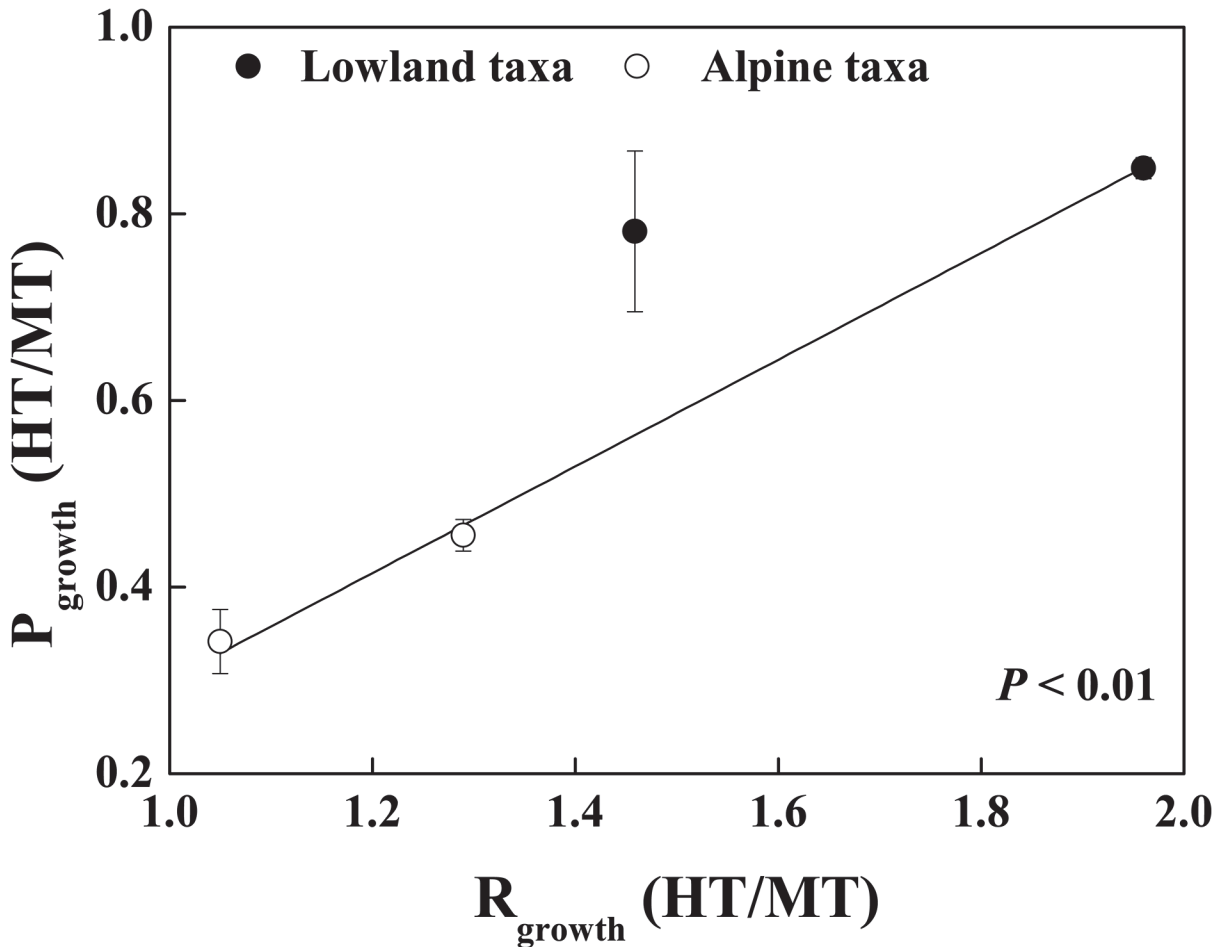

**Fig 1. Relationships of thermal acclimation between respiration and photosynthetic rates among four *Picea* taxa.** The ratio for degree of the acclimation,  $P_{\text{growth}} \text{ (MT/HT)}$  and  $R_{\text{growth}} \text{ (MT/HT)}$ , is close to 1.0 indicates that the temperature acclimation is high. The solid line represented the regression line, and significance of regression ( $P$ ) were shown. Values are the mean and SE;  $n = 3 \sim 5$ .

doi:10.1371/journal.pone.0123248.g001

significantly related to  $P_{\text{growth}} \text{ (HT/MT)}$  (Fig 1), reflecting that homeostasis of respiration and photosynthesis was interdependent.

Overall growth over four months, the approximated biomass increment ( $\Delta D^2H$ ) was higher at 25°C for the alpine taxa (*P. likiangensis* varieties) than for the lowland taxa (Table 1 and S1 Table). In all taxa,  $\Delta D^2H$  at 35°C was significantly lower than at 25°C, with the difference larger for two *P. likiangensis* varieties (the alpine taxa).

### High temperature adjustments in temperature-response parameters of photosynthesis and respiration

High temperature stress treatment resulted in a shift in the temperature response curves for net photosynthesis (Fig 2), such that leaves in HT conditions had higher  $T_{\text{opt}}$  than that in MT conditions, except for *P. meyeri* (Table 2 and S1 Table).  $T_{\text{opt}}$  differed significantly between taxa for MT leaves but not for HT leaves. But there was no significant differences in  $T_{\text{opt}}$  between alpine and lowland taxa for HT or MT leaves (Table 2).

Comparing temperature treatments, high growth temperature decreased  $P_{\text{opt}}$ , but this effect was significantly pronounced in the alpine taxa, *P. likiangensis* var. *linzhiensis* and *P.*

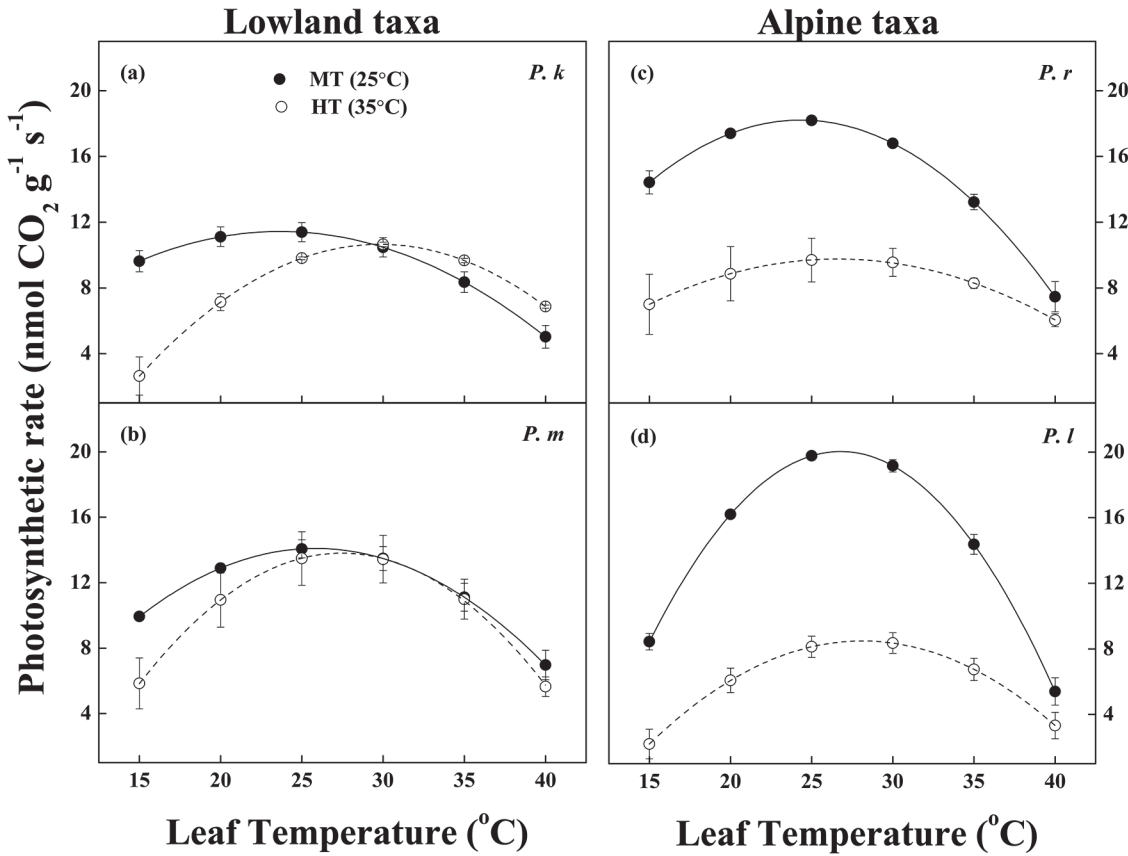

**Fig 2. Relationships between leaf photosynthetic rate and temperature for four *Picea* taxa under two temperature treatments.** (a) *Picea koraiensis* (*P. k*), (b) *P. meyeri* (*P. m*), (c) *P. likiangensis* var. *rubescens* (*P. r*), and (d) *P. likiangensis* var. *linzhiensis* (*P. l*). Each value is presented by mean and SE,  $n = 3 \sim 5$ .

doi:10.1371/journal.pone.0123248.g002

*likiangensis* var. *rubescens* (Table 2, Fig 2 and S1 Table). For MT leaves,  $P_{opt}$  was higher in the alpine taxa than the lowland taxa, such that  $P_{opt}$  for *P. likiangensis* var. *linzhiensis* >  $P_{opt}$  for *P. likiangensis* var. *rubescens* >  $P_{opt}$  for *P. meyeri* >  $P_{opt}$  for *P. koraiensis* leaves. This pattern was reversed after high temperature stress treatments (Table 2). *P. meyeri* had a higher value than the two alpine taxa (S1 Table).

For the respiration of lowland taxa (*P. koraiensis* and *P. meyeri*), the temperature-response functions displayed the constant values in the elevation ( $R_{15}$ ) and slope ( $Q_{10}$ , 15–40°C) of the curves both in MT and HT conditions (Table 2, Fig 3A and 3B and S1 Table). By contrast, high temperature stress treatment only adjusted in downward slopes ( $Q_{10}$ , 15–40°C) in the alpine taxa (*P. likiangensis* var. *rubescens* and *P. likiangensis* var. *linzhiensis*) (Table 2, Fig 3C and 3D and S1 Table). Furthermore,  $R_{15}$  was significantly lower for lowland taxa, whereas  $Q_{10}$  were higher for lowland taxa, irrespective of the growth temperature (Table 2).

### Effects of high temperature on leaf construction

As parameters of the leaf construction, the values of LMA and  $N_{area}$  exhibited few significant differences among taxa. In HT leaves, LMA was lower in *P. likiangensis* var. *linzhiensis* than in other taxa, and in the alpine taxa relative to the lowland taxa (Table 2 and S1 Table). Furthermore, between the alpine (but not the lowland) taxa, LMA was higher in MT than in HT leaves. The only notable differences for  $N_{area}$  in HT leaves was that *P. meyeri* had higher  $N_{area}$  than

**Table 2. Effects of growth temperature and geographical locations on several measured indicators concerned with the temperature acclimation of photosynthesis and respiration.**

| Variables                                                         |    | Low altitude taxa | High altitude taxa |
|-------------------------------------------------------------------|----|-------------------|--------------------|
| $T_{opt}$ (°C)                                                    | MT | 24.71 ± 0.54 aA   | 25.46 ± 0.54 aA    |
|                                                                   | HT | 28.59 ± 0.54 bA   | 28.23 ± 0.70 bA    |
| $P_{opt}$ (nmol CO <sub>2</sub> g <sup>-1</sup> s <sup>-1</sup> ) | MT | 12.78 ± 0.71 aA   | 19.15 ± 0.37 aB    |
|                                                                   | HT | 12.23 ± 0.99 aA   | 9.26 ± 0.69 bB     |
| PNUE (nmol CO <sub>2</sub> mg <sup>-1</sup> s <sup>-1</sup> )     | MT | 0.74 ± 0.03 aA    | 1.27 ± 0.11 aB     |
|                                                                   | HT | 0.53 ± 0.03 bA    | 0.49 ± 0.05 bA     |
| $R_{15}$ (nmol CO <sub>2</sub> g <sup>-1</sup> s <sup>-1</sup> )  | MT | 2.47 ± 0.19 aA    | 3.28 ± 0.20 aB     |
|                                                                   | HT | 2.14 ± 0.10 aA    | 2.77 ± 0.18 aB     |
| $Q_{10}$                                                          | MT | 2.23 ± 0.11 aA    | 1.98 ± 0.04 aA     |
|                                                                   | HT | 2.04 ± 0.10 aA    | 1.74 ± 0.02 bB     |
| LMA (g m <sup>-2</sup> )                                          | MT | 235.22 ± 4.59 aA  | 212.08 ± 11.67 aA  |
|                                                                   | HT | 229.24 ± 7.85 aA  | 181.58 ± 7.88 bB   |
| $N_{area}$ (g m <sup>-2</sup> )                                   | MT | 4.05 ± 0.09 aA    | 3.53 ± 0.43 aA     |
|                                                                   | HT | 4.47 ± 0.19 aA    | 3.22 ± 0.49 aA     |

Notes: Each value represents mean ± SE. Letters after SE values distinguish between statistically separable ( $P < 0.05$ ) values for different temperature treatment (a, b) and different geographical locations in same temperature treatment (A, B).  $n = 6 \sim 10$ .

doi:10.1371/journal.pone.0123248.t002

other taxa (S1 Table), and the values of  $N_{area}$  was lower in the alpine taxa relative to the lowland taxa (Table 2). Meanwhile, the nitrogen use efficiency of photosynthesis (PNUE) was lower in HT leaves than that in MT leaves, and higher in the alpine taxa relative to the lowland taxa at MT (Table 2 and S1 Table).

## Discussion

Temperature is one of the most important factors affecting plant growth and distribution [35, 38, 39]. Here, we used a combination of gas exchange parameters and growth characteristics of four *Picea* taxa grown at two different temperatures, and detected two clear patterns in their long-term responses to high temperature stress: first, the alpine taxa showed higher respiration acclimation, and the lowland taxa exhibited greater photosynthetic acclimation; and second, high temperature inhibited growth in *Picea* taxa, especially the larger reduction in high altitude taxa.

### Photosynthetic acclimation of *Picea* seedlings to high temperature

Our results showed that the alpine taxa had higher  $P_{growth}$  than the lowland taxa in MT [25°C /15°C (day/night temperature)] (Table 1 and S1 Table), similar to patterns observed in *Crepis pygmaea* and *Isatis apennina* [40]. Two altitude groups had lowered photosynthetic rates ( $P_{growth}$ ) at HT [35°C /15°C (day/night temperature)], relative to MT (Table 1), indicating that photosynthetic acclimation at high temperature stress was not complete in any of these species [10]. Previous studies had reported an upward shift in  $T_{opt}$  to acclimate to a higher temperature [4, 13, 41]; in *Picea* there was an upward shift in  $T_{opt}$  of 3.32°C (from 25.09°C to 28.41°C in average; Table 2 and S1 Table) to weaken to the high temperature stress.

There was disagreement over the relative importance of climate of origin, and temperature treatment, for causing shifts in  $T_{opt}$  [41–44]. Our data showed a similar effect to that found by [4]: inherent differences between species, such as the climate in the range or provenance of the species had much less effect on  $T_{opt}$  than the temperature they were grown at *in vitro* (Table 2



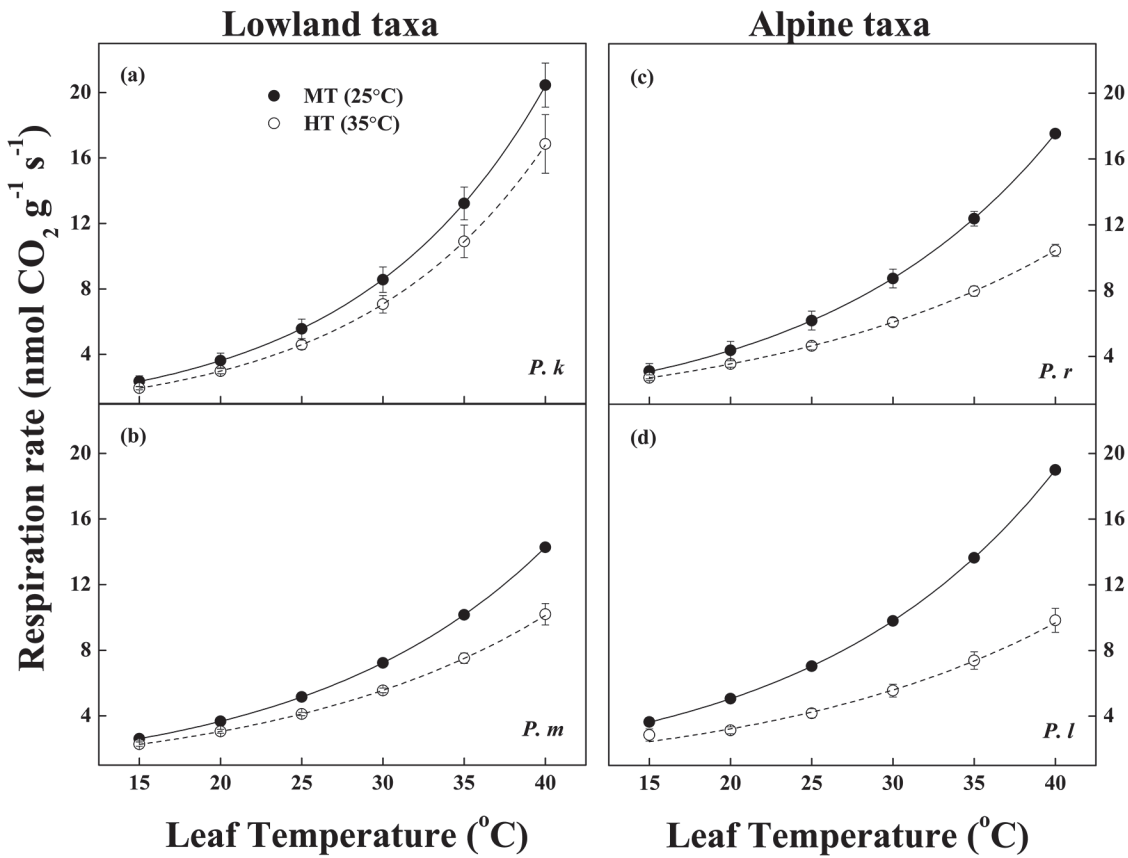

**Fig 3. Temperature response curves of the respiratory rate in four *Picea* taxa under two temperature treatments.** (a) *Picea koraiensis*, (b) *P. meyeri*, (c) *P. likiangensis* var. *rubescens*, and (d) *P. likiangensis* var. *linzhienensis*. See Fig 2 for species abbreviations. Each value is presented by mean and SE,  $n = 3 \sim 5$ .

doi:10.1371/journal.pone.0123248.g003

and S1 Table). Likewise, previous findings that elevated temperatures above  $T_{opt}$  led to reductions in  $P_{opt}$  [14, 37, 45] and  $P_{growth}$  [8], were supported: both quantities decreased above  $T_{opt}$  in our *Picea* species, especially the two alpine taxa (*P. likiangensis* vars. *rubescens* and *linzhienensis*; Table 2 and S1 Table).

Variations in  $P_{opt}$  may also be related to differences in leaf constructions and biochemical processes [25, 26, 46–48]. Work on leaf economics spectrum (LES) had already suggested that leaf photosynthesis was closely related with leaf  $N_{area}$  and LMA [21]. Increased  $N_{area}$  and decreased LMA can both be compensatory mechanisms for the deleterious effects of high temperature [23, 24, 27]. In our study, only slight decreased values of LMA between temperature treatments for the alpine taxa were suggested high temperature stress changed in the leaf anatomy and density for the alpine taxa (Table 2 and S1 Table). However, changed in LMA was unlikely to explain temperature treatment differences in  $P_{opt}$ . Further, the constant values of  $N_{area}$ , but reduction in PNUE were suggest high temperature stress inhibited the photosynthetic enzymatically catalysed reactions and the electron transport capacity [27, 49, 50] Meanwhile, these results were suggested nitrogen use was more important for photosynthetic acclimation than nitrogen content [19].

Overall, *Picea* taxa varied in the extent to which  $P_{growth}$  decreases at higher temperatures, indicating that the thermal acclimation of photosynthesis was species-specific, and might be closely related to the natural distribution of taxa [10, 35, 41], because of lower elevated

temperature compared with higher mean growth season temperature of the lowland taxa in higher growing temperature.

## Respiration acclimation of *Picea* seedlings to high temperature

As we expected, the alpine taxa had higher base respiratory rates ( $R_{15}$ ) than the lowland taxa (Tables 1 and 2 and S1 Table), because of the lower temperature of their growth seasons ( $T_{\text{growth}}$ ) in high altitudes. [18] also found that the base respiratory rate at 5°C was higher in cooler periods for *Pinus banksiana*. At high temperature stress (35°C), the  $R_{\text{growth}}$  for all taxa were increased (Table 1 and S1 Table), reflected increased demand for energy to maintenance [12]. However, different altitude taxa showed varied  $R_{\text{growth}}$ , caused by different respiratory acclimation. Thermal acclimation of respiration resulted in an alteration in the shape or elevation of the temperature-response curve as plants were grown in warmer temperatures [5, 12]. And,  $Q_{10}$  and  $R_{15}$  derived from curve-fitting procedures were not strictly independent [18]. In our study, only significantly downward adjustment in  $Q_{10}$  (15–40°C) with no changes in  $R_{15}$  between MT and HT treatment in the alpine taxa (*P. likiangensis* var. *rubescens* and *P. likiangensis* var. *linzhiensis*) were consistent with a Type I acclimation [5, 51], unlike the lowland *Picea* taxa. Meanwhile, the variation in thermal acclimation of respiration was underpin by the larger changed in  $Q_{10}$  with high temperature stress than slight adjustment of  $R_{15}$  (Table 2, Fig 3 and S1 Table).

A significant downshift in  $Q_{10}$  at higher temperatures for the alpine *Picea* taxa indicates that the alpine taxa had higher ability of adjustment in the temperature sensitivity of the temperature-response function at high temperature stress. These larger reductions of  $Q_{10}$  resulted in limited  $R_{\text{growth}}$  of the alpine taxa via regulatory changes in respiratory enzymes, in particular, lack of substrate availability and degree of adenylate at long-term high temperature stress [5, 51]. Because long-term high temperature stress restricted their photosynthetic rates (Table 1 and S1 Table) [12]. This reflected the interdependence of respiration and photosynthesis. Meanwhile, respiration equally might be limiting photosynthesis, because photosynthesis likewise depends on respiration for a range of compounds (e.g. ATP) [17; 46]. Therefore, the thermal acclimation of respiration would be related to photosynthetic acclimated to temperatures [19]. As a result, different respiratory acclimation were highly correlated with the photosynthetic acclimation (Fig 1). However, there were smaller declines in  $Q_{10}$ , and higher uplifts in  $R_{\text{growth}}$  in the lowland taxa (Table 2 and S1 Table), indicating a lower degree of respiration acclimation in the lowland taxa (Table 1 and Fig 1).

## *Picea* seedlings of diverse climatic origin differ in the acclimation of photosynthesis and respiration

Growth seasons were warmer at lower altitudes, and plants had developed various mechanisms to enhance their tolerance to higher temperatures stress via adjustments of physiological and morphological characteristics [4, 10]. Greater tolerance of higher temperatures stress in the lowland taxa was indicated by higher LMA and  $N_{\text{area}}$ , and a smaller shift in PNUE between moderate and high temperatures. This meant more carbon partitioning to preventive architecture, more proteins and higher stability of photosynthetic enzymatically catalysed reactions and membrane processes. Therefore, there was a greater degree of photosynthesis acclimation in the lowland taxa than in the alpine taxa (Table 1 and Fig 1), and photosynthetic apparatus for the lowland taxa was more tolerant of high temperature.

In the lowland taxa, relative to the alpine taxa,  $R_{\text{growth}}$  at HT was higher but acclimation of respiration was lower. This was caused by the more stable photosynthetic process of the lowland taxa (Fig 1), which need more energy for maintenance to protein turnover and

membranes at high temperature stress [12]. Meanwhile, higher  $R_{\text{growth}}$  prevented chloroplast over-redox at high temperature [12]. Generalisations about the effects of altitude on acclimation potential were difficult because of contrasting results from earlier studies [11, 17]; however, high acclimation of respiration was often associated with changing in LMA [12, 16]. Our results for *P. likiangensis* var. *linzhiensis* supported this hypothesis. However, leaves of slow-growing conifers like *Picea* may have had low potential acclimation than those of fast-growing species [17].

### Inhibition of growth when *Picea* taxa are exposed to high temperature

Trees growing naturally in cooler regions were often assumed to be temperature limited [6]; while moderate warmer temperatures would enhance growth [52]. If temperature rises beyond the thermal optimum of growth, the resulting imbalance of photosynthesis and respiration may cause inhibition of growth [8, 25, 26]. We found that biomass accumulation ( $\Delta D^2H$ ) in all four *Picea* taxa was reduced at HT (35°C daytime temperature), indicating inhibition of growth [25, 26]. Various *Picea* taxa, including boreal species, had been shown to have acclimated by shifting  $T_{\text{opt}}$  when temperature changes (either in the laboratory or in the field) [4, 13, 41, 51]. This can involve interactions between the physiological and morphological characteristics, such as changes in photosynthetic and respiratory capacities and leaf structure [10, 12, 16, 22, 53]. However, the small shifts in  $T_{\text{opt}}$  (3.3°C) observed here were not enough to compensate for deleterious effects of long-term exposure to high temperature stress, confirming that daytime temperature stress of 35°C exceed *Picea* species' capacity to adjust their thermal optimum [8].

### Conclusions

Overall, our results suggested that stress imposed by high growth temperature reduced the growth of *Picea* seedlings, causing decreased photosynthesis and increased respiration. Furthermore, we found that the lowland taxa (*P. koraiensis* and *P. meyeri*) exhibited higher photosynthetic acclimation and lower respiratory acclimation than the alpine taxa (*P. likiangensis* vars. *rubescens* and *linzhiensis*). Photosynthetic acclimation had been considered to be related to changes in  $N_{\text{area}}$  and LMA. However, the variations in photosynthetic acclimation were mainly determined by differences in PNUE. On the other hand, the extent of respiratory acclimation was considered to interact with photosynthetic rates. Thus, seedlings of the alpine taxa (*P. likiangensis* var. *rubescens* and *P. likiangensis* var. *linzhiensis*) were more susceptible to high temperature than the lowland taxa (*P. koraiensis* and *P. meyeri*).

### Supporting Information

**S1 Table. Comparison of all measured indicators between 25°C (MT) and 35°C (HT) treatments in each *Picea* taxon.**

(DOC)

### Author Contributions

Conceived and designed the experiments: CMZ JQL. Performed the experiments: XWZ JRW MFJ MHW. Analyzed the data: XWZ SS JRW. Contributed reagents/materials/analysis tools: JQL CMZ. Wrote the paper: XWZ RIM SLY CMZ. Nursed the seedlings: XWZ MFJ.

### References

1. Dewar RC, Medlyn BE, McMurtrie RE. Acclimation of the respiration photosynthesis ratio to temperature: insights from a model. *Global Change Biol.* 1999; 5: 615–622.

2. Wythers KR, Reich PB, Tjoelker MG, Bolstad PB. Foliar respiration acclimation to temperature and temperature variable  $Q_{10}$  alter ecosystem carbon balance. *Global Change Biol.* 2005; 11: 435–449.
3. Luo Y. Terrestrial carbon-cycle feedback to climate warming. *Annu Rev Ecol Evol S.* 2007; 38: 683–712.
4. Gunderson CA, O'Hara KH, Campion CM, Walker AV, Edwards NT. Thermal plasticity of photosynthesis: the role of acclimation in forest responses to a warming climate. *Global Change Biol.* 2010; 16: 2272–2286.
5. Atkin OK, Tjoelker MG. Thermal acclimation and the dynamic response of plant respiration to temperature. *Trends Plant Sci.* 2003; 8: 343–351. PMID: [12878019](#)
6. Way DA, Oren R. Differential responses to changes in growth temperature between trees from different functional groups and biomes: a review and synthesis of data. *Tree Physiol.* 2010; 30: 669–88. doi: [10.1093/treephys/tpq015](#) PMID: [20368338](#)
7. IPCC. *Climate Change 2007: The scientific basis. Contribution of Working Group I to the Fourth Assessment Report of the Intergovernmental Panel on Climate Change.* (Solomon S, Qin D, Manning M, Chen Z, Marquis M, Averyt KB, et al. editors). Cambridge: Cambridge University Press; 2007.
8. Day ME. Influence of temperature and leaf-to-air vapor pressure deficit on net photosynthesis and stomatal conductance in red spruce (*Picea rubens*). *Tree Physiol.* 2000; 20: 57–63. PMID: [12651527](#)
9. Billings WD, Godfrey PJ, Chabot BF, Bourque DP. Metabolic acclimation to temperature in arctic and alpine ecotypes of *Oxyria digyna*. *Arct Alp Res.* 1971; 3: 277–289.
10. Berry J, Björkman O. Photosynthetic response and adaptation to temperature in higher plants. *Annu Rev Plant Physiol Plant Mol Biol.* 1980; 31: 491–543.
11. Larigauderie A, Körner C. Acclimation of leaf dark respiration to temperature in alpine and lowland plant species. *Ann Bot.* 1995; 76: 245–252.
12. Atkin OK, Bruhn D, Tjoelker MG. Response of plant respiration to changes in temperature: Mechanisms and consequences of variations in  $Q_{10}$  values and acclimation. In: Lambers H, Ribas-Carbo M, editors. *Plant respiration.* Springer: Netherlands; 2005a. pp. 95–135.
13. Mooney HA, Bjorkman O, Collatz GJ. Photosynthetic Acclimation to Temperature in the desert shrub, *Larrea divaricata*: I. Carbon dioxide exchange characteristics of intact leaves. *Plant Physiol.* 1978; 61: 406–410. PMID: [16660303](#)
14. Xiong FS, Mueller EC, Day TA. Photosynthetic and respiratory acclimation and growth response of Antarctic vascular plants to contrasting temperature regimes. *Am J Bot.* 2000; 87: 700–710. PMID: [10811794](#)
15. Tjoelker MG, Oleksyn J, Reich PB. Acclimation of respiration to temperature and  $CO_2$  in seedlings of boreal tree species in relation to plant size and relative growth rate. *Global Change Biol.* 1999; 5: 679–691.
16. Atkin OK, Bruhn D, Hurry VM, Tjoelker MG. The hot and the cold: unravelling the variable response of plant respiration to temperature. *Funct Plant Biol.* 2005b; 32: 87–105.
17. Atkin OK, Scheurwater I, Pons TL. High thermal acclimation potential of both photosynthesis and respiration in two lowland *Plantago* species in contrast to an alpine congeneric. *Global Change Biol.* 2006; 12: 500–515.
18. Tjoelker MG, Oleksyn J, Lorenc-Plucinska G, Reich PB. Acclimation of respiratory temperature responses in northern and southern populations of *Pinus banksiana*. *New Phytol.* 2009; 181: 218–29. doi: [10.1111/j.1469-8137.2008.02624.x](#) PMID: [18811616](#)
19. Yamori W, Noguchi K, Hikosaka K, Terashima I. Cold-tolerant crop species have greater temperature homeostasis of leaf respiration and photosynthesis than cold-sensitive Species. *Plant Cell Physiol.* 2009; 50: 203–215. doi: [10.1093/pccp/pcn189](#) PMID: [19054809](#)
20. Ashraf M, Harris PJC. Photosynthesis under stressful environments: An overview. *Photosynthetica.* 2013; 2: 163–190.
21. Wright IJ, Reich PB, Westoby M, Ackerly DD, Baruch Z, Bongers F, et al. The worldwide leaf economics spectrum. *Nature.* 2004; 428:821–827. PMID: [15103368](#)
22. Turnbull MH, Whitehead D, Tissue DT, Schuster WSF, Brown KJ, Griffin KL. Responses of leaf respiration to temperature and leaf characteristics in three deciduous tree species vary with site water availability. *Tree Physiol.* 2001; 21: 571–578. PMID: [11390301](#)
23. Poorter H, Evans JR. Photosynthetic nitrogen-use efficiency of species that differ inherently in specific leaf area. *Oecologia.* 1998; 116: 26–37.
24. Yamori W, Noguchi K, Terashima I. Temperature acclimation of photosynthesis in spinach leaves: analyses of photosynthetic components and temperature dependencies of photosynthetic partial reactions. *Plant Cell Environ.* 2005; 28: 536–547.

25. Way DA, Sage RF. Elevated growth temperatures reduce the carbon gain of black spruce [*Picea mariana* (Mill.) B.S.P.]. *Global Change Biol.* 2008a; 14: 624–636.
26. Way DA, Sage RF. Thermal acclimation of photosynthesis in black spruce [*Picea mariana* (Mill.) B.S.P.]. *Plant Cell Environ.* 2008b; 31: 1250–1262. doi: [10.1111/j.1365-3040.2008.01842.x](https://doi.org/10.1111/j.1365-3040.2008.01842.x) PMID: [18532986](https://pubmed.ncbi.nlm.nih.gov/18532986/)
27. Hikosaka K, Shigeno A. The role of Rubisco and cell walls in the interspecific variation in photosynthetic capacity. *Oecologia.* 2009; 160: 443–451. doi: [10.1007/s00442-009-1315-z](https://doi.org/10.1007/s00442-009-1315-z) PMID: [19288136](https://pubmed.ncbi.nlm.nih.gov/19288136/)
28. Fu L, Li N, Mill RR. *Picea*. In: Wu ZY, Raven PH, editors. *Flora of China*. Beijing and St. Louis: Science Press and Missouri Botanical Garden Press; 1999. pp. 25–32.
29. Farjón A. *World checklist and bibliography of conifers*. London: Royal Botanic Gardens, Kew; 2001.
30. Li Y, Stocks M, Hemmilä S, Källman T, Zhu HT, Zhou YF, et al. Demographic histories of four spruce (*Picea*) species of the Qinghai-Tibetan Plateau and neighboring areas inferred from multiple nuclear loci. *Mol Biol Evol.* 2010; 27: 1001–1014. doi: [10.1093/molbev/msp301](https://doi.org/10.1093/molbev/msp301) PMID: [20031927](https://pubmed.ncbi.nlm.nih.gov/20031927/)
31. Du FK, Peng XL, Liu JQ, Lascoux M, Hu FS, Petit RJ. Direction and extent of organelle DNA introgression between two spruce species in the Qinghai-Tibetan Plateau. *New Phytol.* 2011; 192: 1024–1033. doi: [10.1111/j.1469-8137.2011.03853.x](https://doi.org/10.1111/j.1469-8137.2011.03853.x) PMID: [21883235](https://pubmed.ncbi.nlm.nih.gov/21883235/)
32. Zou JB, Peng XL, Li L, Liu JQ, Miehle G, Opgenoorth L. Molecular phylogeography and evolutionary history of *Picea likiangensis* in the Qinghai-Tibetan Plateau inferred from mitochondrial and chloroplast DNA sequence variation. *J Syst Evol.* 2012; 50: 341–350
33. Miehle G, Miehle S, Vogel J, Co S, Duo L. Highest treeline in the northern hemisphere found in southern Tibet. *MT Res Dev.* 2007; 27: 169–173.
34. Ghannoum O, Way DA. On the role of ecological adaptation and geographic distribution in the response of trees to climate change. *Tree Physiol.* 2011; 31: 1273–1276. doi: [10.1093/treephys/tpr115](https://doi.org/10.1093/treephys/tpr115) PMID: [22158008](https://pubmed.ncbi.nlm.nih.gov/22158008/)
35. Wertin TM, McGuire MA, Teskey RO. Higher growth temperatures decreased net carbon assimilation and biomass accumulation of northern red oak seedlings near the southern limit of the species range. *Tree Physiol.* 2011; 31: 1277–1288. doi: [10.1093/treephys/tpr091](https://doi.org/10.1093/treephys/tpr091) PMID: [21937670](https://pubmed.ncbi.nlm.nih.gov/21937670/)
36. Pontailier JY, Ceulemans R, Guittet J, Mau F. Linear and non-linear functions of volume index to estimate woody biomass in high density young poplar stands. *Ann For Sci.* 1997; 54: 335–345.
37. Niu SL, Li ZX, Xia JY, Han Y, Wu MY, Wan SQ. Climatic warming changes plant photosynthesis and its temperature dependence in a temperate steppe of northern China. *Environ Exp Bot.* 2008; 63: 91–101.
38. He HS, Hao ZQ, Mladenoff DJ, Shao GF, Hu YM, Chang Y. Simulating forest ecosystem response to climate warming incorporating spatial effects in north-eastern China. *J Biogeogr.* 2005; 32: 2043–2056.
39. Ryan MG. Temperature and tree growth. *Tree Physiol.* 2010; 30: 667–668. doi: [10.1093/treephys/tpq033](https://doi.org/10.1093/treephys/tpq033) PMID: [20504778](https://pubmed.ncbi.nlm.nih.gov/20504778/)
40. Gratani L, Catoni R, Pirone G, Frattaroli AR, Varone L. Physiological and morphological leaf trait variations in two Apennine plant species in response to different altitudes. *Photosynthetica.* 2012; 50: 15–23.
41. Cunningham SC, Read J. Comparison of temperate and tropical rainforest tree species: growth responses to temperature. *J Biogeogr.* 2003; 30: 143–153.
42. Cunningham SC, Read J. Comparison of temperate and tropical rainforest tree species: photosynthetic responses to growth temperature. *Oecologia.* 2002; 133: 112–119.
43. Hill RS, Read J, Busby JR. The Temperature-dependence of photosynthesis of some Australian temperate rainforest trees and its biogeographical significance. *J Biogeogr.* 1988; 15: 431–449.
44. Campbell C, Atkinson L, Zaragoza-Castells J, Lundmark M, Atkin O, et al. Acclimation of photosynthesis and respiration is asynchronous in response to changes in temperature regardless of plant functional group. *New Phytol.* 2007; 176: 375–389. PMID: [17692077](https://pubmed.ncbi.nlm.nih.gov/17692077/)
45. Nedlo JE, Martin TA, Vose JM, Teskey RO. Growing season temperatures limit growth of loblolly pine (*Pinus taeda* L.) seedlings across a wide geographic transect. *Trees-Struct Funct.* 2009; 23: 751–759.
46. Zhou X, Liu X, Wallace LL, Luo Y. Photosynthetic and respiratory acclimation to experimental warming for four species in a tallgrass prairie ecosystem. *J Integr Plant Biol.* 2007; 49: 270–281.
47. Zhu X.G, de Sturler E, Long SP. Optimizing the distribution of resources between enzymes of carbon metabolism can dramatically increase photosynthetic rate: A numerical simulation using an evolutionary algorithm. *Plant Physiol.* 2007; 145: 513–526. PMID: [17720759](https://pubmed.ncbi.nlm.nih.gov/17720759/)
48. Lin YS, Medlyn BE, Ellsworth DS. Temperature responses of leaf net photosynthesis: the role of component processes. *Tree Physiol.* 2012; 32: 219–231. doi: [10.1093/treephys/tpr141](https://doi.org/10.1093/treephys/tpr141) PMID: [22278379](https://pubmed.ncbi.nlm.nih.gov/22278379/)

49. Evans JR. Photosynthesis and nitrogen relationships in leaves of C<sub>3</sub> plants. *Oecologia*. 1989; 78: 9–19.
50. Farquhar GD, von Caemmerer S, Berry JA. A biochemical model of photosynthetic CO<sub>2</sub> assimilation in leaves of C<sub>3</sub> species. *Planta*. 1980; 1: 78–90.
51. Smith NG, Dukes JS. Plant respiration and photosynthesis in global-scale models: incorporating acclimation to temperature and CO<sub>2</sub>. *Global Change Biol*. 2013; 19: 45–63.
52. Danby RK, Hik DS. Responses of white spruce (*Picea glauca*) to experimental warming at a subarctic alpine treeline. *Global Change Biol*. 2007; 13: 437–451.
53. Ow LF, Whitehead D, Walcroft AS, Turnbull MH. Seasonal variation in foliar carbon exchange in *Pinus radiata* and *Populus deltoides*: respiration acclimates fully to changes in temperature but photosynthesis does not. *Global Change Biol*. 2010; 16: 288–302.
